# Supplementary material
Source: PubMed Central journal article supplement (PMC3644312)
Supplement: NIHMS432012-supplement-01.pdf [file NIHMS432012-supplement-01.pdf]

Table S1. Mean and 95% confidence interval of the differences in means and proportions in baseline characteristics of black compared to white patients in the overall cohort.

|                                    | Difference | 95% CI         |
|------------------------------------|------------|----------------|
| Age (years)                        | -3.8       | -3.9, -3.7     |
| Married (N, %)                     | -0.19      | -0.19, -0.18   |
| Insured (N, %)                     | -0.1       | -0.1, -0.1     |
| SBP (mmHg)                         | 4.0        | 3.84, 4.16     |
| DBP (mmHg)                         | 4.0        | 3.9, 4.1       |
| DM (N, %)                          | 0.09       | 0.09, 0.1      |
| Cardiovascular disease (N, %)      | -0.15      | -0.15, -0.15   |
| Hypertension (N, %)                | 0.09       | 0.08, 0.09     |
| CHF (N, %)                         | 0.03       | 0.02, 0.03     |
| PVD (N, %)                         | 0.009      | 0.007, 0.010   |
| Cerebrovascular disease (N, %)     | 0.016      | 0.013, 0.02    |
| Chronic Lung Disease (N, %)        | -0.034     | -0.038, -0.031 |
| Rheumatology Disease (N, %)        | -0.004     | -0.002, -0.005 |
| Peptic ulcer disease (N, %)        | 0.004      | -0.002, 0.005  |
| Liver disease (N, %)               | 0.001      | 0.0003, 0.002  |
| Malignancy (N, %)                  | 0.05       | 0.04, 0.05     |
| AIDS/HIV                           | 0.009      | 0.008, 0.010   |
| Charlson index                     | 0.4        | 0.38, 0.42     |
| eGFR (ml/min/1.73m <sup>2</sup> )  | -1.2       | -1.3, -1.1     |
| WBC count (1,000/mm <sup>3</sup> ) | -0.9       | -0.94, -0.86   |
| Cholesterol (mg/dl)                | 6.0        | 5.7, 6.3       |
| Bicarbonate (mEq/L)                | -0.5       | -0.53, -0.47   |
| Calcium (mg/dl)                    | 0.0        | 0.0, 0.0       |
| Hemoglobin (g/dl)                  | -0.9       | -0.92, -0.88   |
| Albumin (g/dl)                     | -0.1       | -0.1, -0.1     |
| Alkaline phosphatase (U/l)         | 7.0        | 6.7, 7.3       |

DM, diabetes mellitus; CHF, congestive heart failure; PVD, peripheral vascular disease; SBP, systolic blood pressure; DBP, diastolic blood pressure; eGFR, estimated glomerular filtration rate; WBC, white blood cell count.
